# Supplementary figures and images for: Clinical significance of radiotherapy in patients with primary uterine carcinosarcoma: a multicenter retrospective study (KROG 13-08)
Source: PubMed Central journal article supplement — J Gynecol Oncol. 2016 Jul 11;27(6):e58. doi: 10.3802/jgo.2016.27.e58 (PMC5078821; doi:10.3802/jgo.2016.27.e58), 2016-07-11

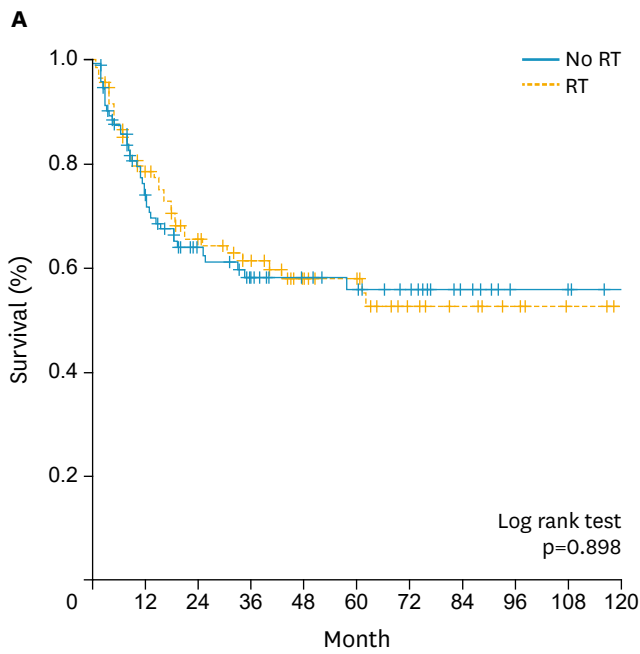

|       | No. at risk |    |    |    |    |    |    |    |   |   |   |
|-------|-------------|----|----|----|----|----|----|----|---|---|---|
| No RT | 115         | 69 | 46 | 36 | 29 | 25 | 21 | 13 | 8 | 7 | 5 |
| RT    | 95          | 70 | 50 | 39 | 26 | 23 | 15 | 12 | 9 | 6 | 4 |

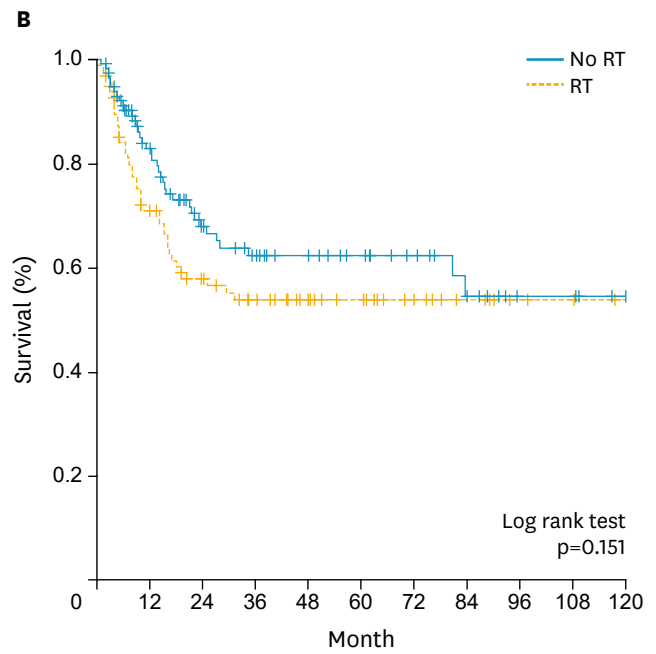

|       | No. at risk |    |    |    |    |    |    |    |   |   |   |
|-------|-------------|----|----|----|----|----|----|----|---|---|---|
| No RT | 114         | 77 | 49 | 40 | 31 | 26 | 20 | 13 | 8 | 7 | 4 |
| RT    | 95          | 62 | 43 | 34 | 25 | 21 | 14 | 10 | 7 | 5 | 4 |

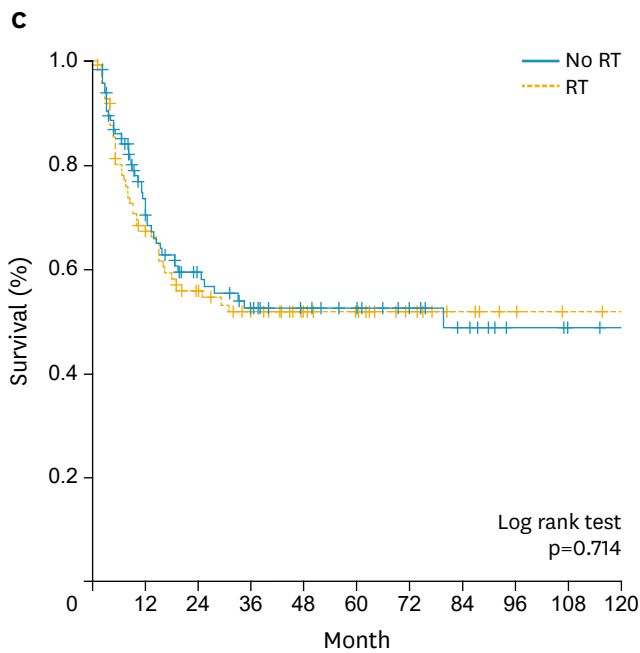

|       | No. at risk |    |    |    |    |    |    |    |   |   |   |
|-------|-------------|----|----|----|----|----|----|----|---|---|---|
| No RT | 115         | 68 | 44 | 34 | 27 | 23 | 18 | 12 | 7 | 6 | 4 |
| RT    | 96          | 61 | 43 | 34 | 25 | 21 | 14 | 10 | 7 | 5 | 4 |

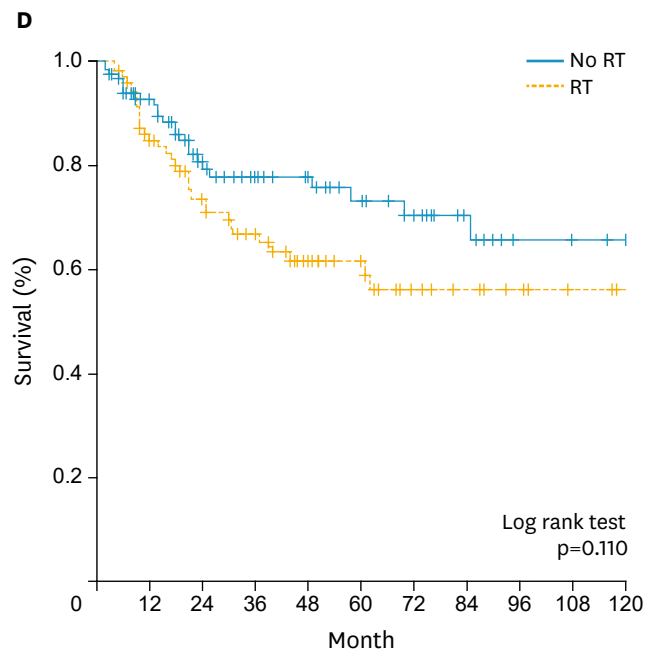

|       | No. at risk |    |    |    |    |    |    |    |   |   |   |
|-------|-------------|----|----|----|----|----|----|----|---|---|---|
| No RT | 110         | 84 | 57 | 45 | 36 | 29 | 23 | 15 | 9 | 7 | 5 |
| RT    | 92          | 74 | 55 | 42 | 29 | 23 | 15 | 12 | 9 | 6 | 4 |

Supplement: jgo-27-e58-s001.pdf [file jgo-27-e58-s001.pdf]
